# Supplementary material for: Quartz crystal microbalance based biosensors for detecting highly metastatic breast cancer cells via their transferrin receptors
Source: Royal Society of Chemistry journal article supplement (doi:10.1039/c5ay02898a), 2015-11-13
Supplement: c5ay02898a1.pdf [file c5ay02898a1.pdf]

**Figure S1.A.** The FTIR-ATR spectrum of PHEMA nanoparticles adsorbed QCM chip surface.

**Figure S1.B.** The FTIR-ATR spectrum of transferrin attached PHEMA coated QCM chip surface.

**Figure S2.** Ellipsometer images of QCM sensor surface without (a) and with transferrin (b)
