# Supplementary figures and images for: Quartz crystal microbalance based biosensors for detecting highly metastatic breast cancer cells via their transferrin receptors
Source: Royal Society of Chemistry journal article supplement (doi:10.1039/c5ay02898a), 2015-11-13

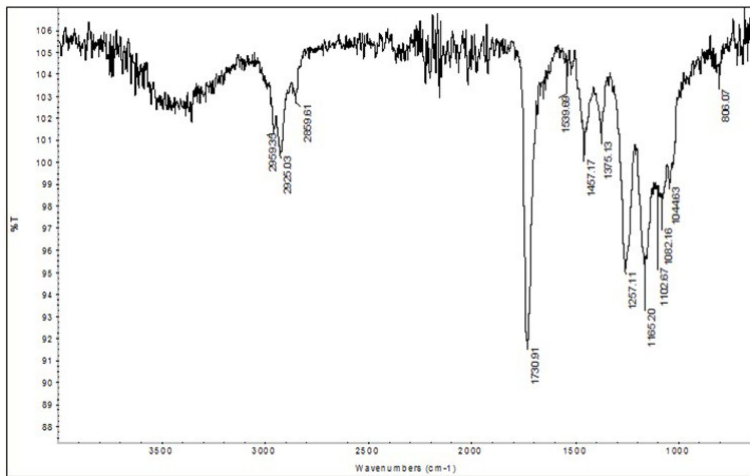

Supplement: c5ay02898a2.pdf [file c5ay02898a2.pdf]

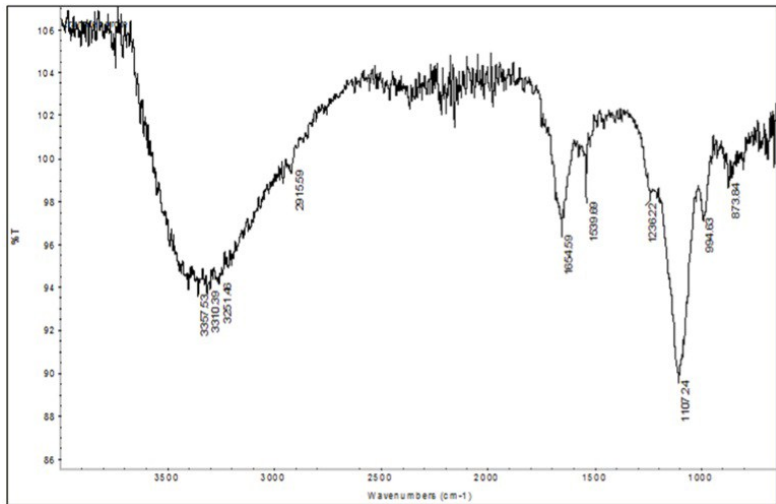

Supplement: c5ay02898a3.pdf [file c5ay02898a3.pdf]

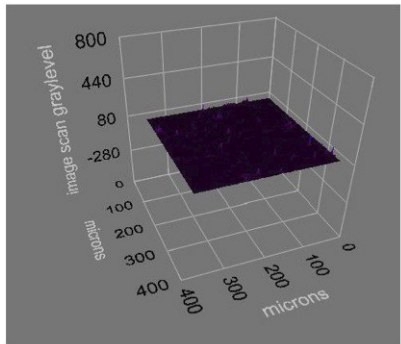

(a)

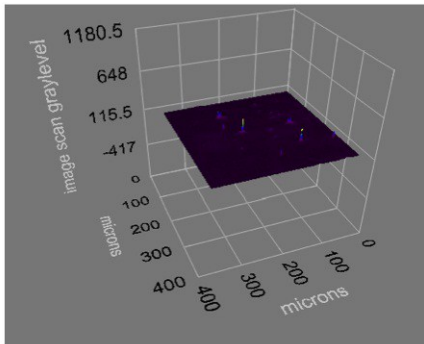

(b)

Supplement: c5ay02898a4.pdf [file c5ay02898a4.pdf]
